# Supplementary material
Source: PubMed Central journal article supplement (PMC7093133)
Supplement: IAI.00882-19-s0001.pdf [file IAI.00882-19-s0001.pdf]

**Supplementary Table 1.** Minor allele frequencies of the *ARNT2*<sub>rs1374213</sub>, *CX3CR1*<sub>rs9823718</sub> and *CX3CR1*<sub>rs7631529</sub> SNPs in the overall population (Discovery and Replication populations; n=974).

| dbSNPs                             | MINOR ALLELE FREQUENCY |              |                  |              |                |              |                |              |
|------------------------------------|------------------------|--------------|------------------|--------------|----------------|--------------|----------------|--------------|
|                                    | SPAIN (n=697)          |              | PORTUGAL (n=130) |              | GERMANY (n=57) |              | AUSTRIA (n=90) |              |
|                                    | IA cases               | Non-IA cases | IA cases         | Non-IA cases | IA cases       | Non-IA cases | IA cases       | Non-IA cases |
| <i>ARNT2</i> <sub>rs1374213</sub>  | 0.5569                 | 0.4320       | 0.5926           | 0.4438       | 0.5952         | 0.4393       | 0.4167         | 0.4012       |
| <i>CX3CR1</i> <sub>rs9823718</sub> | 0.1875                 | 0.0953       | 0.1389           | 0.1235       | 0.0750         | 0.0294       | 0.1667         | 0.0493       |
| <i>CX3CR1</i> <sub>rs7631529</sub> | 0.1278                 | 0.0614       | 0.1200           | 0.0681       | 0.0227         | 0.0147       | 0.0833         | 0.0487       |
