# Supplementary material
Source: PubMed Central journal article supplement (PMC7093133)
Supplement: IAI.00882-19-s0002.pdf [file IAI.00882-19-s0002.pdf]

**Supplementary Figure 1.** Linkage disequilibrium (LD) blocks in the ARNT2 and CX3CR1 genes and association estimates in the discovery population.

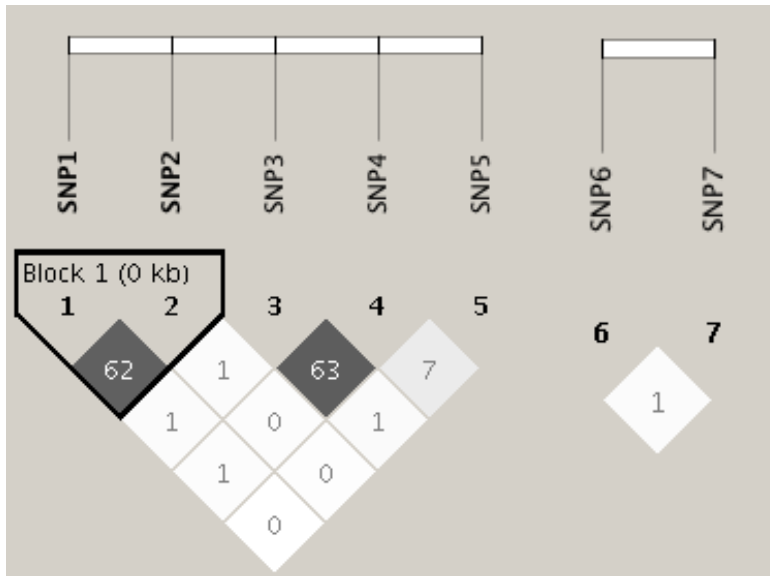

- SNP1: *CX3CR1*<sub>rs7631529</sub>
- SNP2: *CX3CR1*<sub>rs9823718</sub>
- SNP3: *CX3CR1*<sub>rs9862876</sub>
- SNP4: *CX3CR1*<sub>rs9868689</sub>
- SNP5: *CX3CR1*<sub>rs12107527</sub>
- SNP6: *ARNT2*<sub>rs1374213</sub>
- SNP7: *ARNT2*<sub>rs12439281</sub>
